# Supplementary material for: Label-free test kit for d-amino acid analysis by 1,4-benzenediboronic-acid-induced aggregation of gold nanoparticles
Source: Royal Society of Chemistry journal article supplement (doi:10.1039/d0ay00800a), 2020-01-01
Supplement: d0ay00800a1.pdf [file d0ay00800a1.pdf]

## Supporting information

### Label-free kit test for D-amino acid analysis by 1, 4-Benzenediboronic-Acid-Induced Aggregation of Gold Nanoparticles

Yan Zeng<sup>a,b,c</sup>, Peng Qi<sup>a,b,c\*</sup>, Dun Zhang<sup>a,b,c\*</sup>

*<sup>a</sup>Key Laboratory of Marine Environmental Corrosion and Bio-fouling, Institute of Oceanology, Chinese Academy of Sciences, 7 Nanhai Road, Qingdao 266071, China*

*<sup>b</sup>Open studio for Marine Corrosion and Protection, Qingdao National Laboratory for Marine Science and Technology, 1 Wenhai Road, Qingdao 266237, China*

*<sup>c</sup>Center for Ocean Mega-Science, Chinese Academy of Sciences, 7 Nanhai Road, Qingdao, 266071, China*

---

**\* Corresponding author. Tel.: + 86 532 82893612; Fax: + 86 532 82893612.**

**E-mail addresses: [gipeng@qdio.ac.cn](mailto:gipeng@qdio.ac.cn) (P. Qi).**

**\* Corresponding author. Tel.: + 86 532 82898960; Fax: + 86 532 82898960.**

**E-mail addresses: [zhangdun@qdio.ac.cn](mailto:zhangdun@qdio.ac.cn) (D. Zhang).**

Figure S1

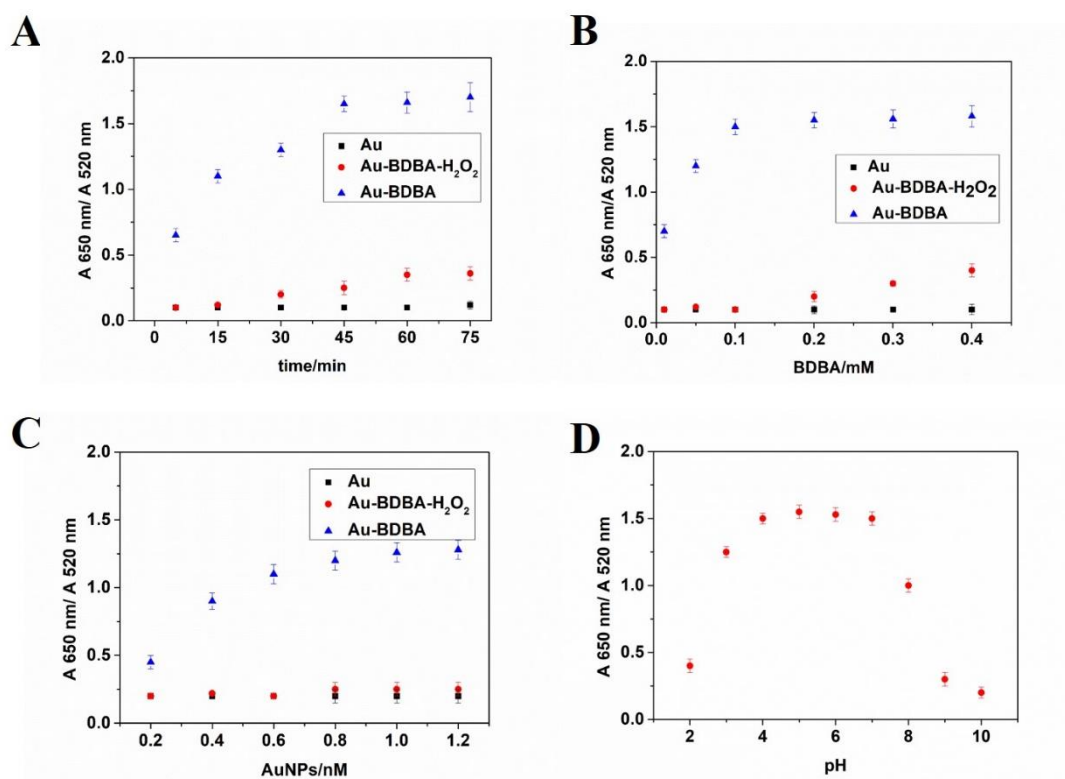

Figure S1 Effect of the reaction time between DAAs and DAAO (A); concentration of BDBA reacted with AuNPs (B); concentration of citrate-capped AuNPs for aggregation (C); and buffer pH for  $H_2O_2$ ·BDBA reaction (D) Black square: citrate-capped AuNPs. Red circle: citrate-capped AuNPs and BDBA. Blue triangle: citrate-capped AuNPs, BDBA, and  $H_2O_2$ . The error bars represent standard deviation based on three independent measurements. The optimized experimental conditions are: concentrations of AuNPs and BDBA are 1.0 nM and 0.1 mM, respectively. DAAs oxidation products would react with BDBA at room temperature for 45 min under phosphate buffer (pH 4.0)

**Table S1 Kit for DAAs test in *S. aureus* bacteria by using BDBA-induced Aggregation of Au NPs system (n=6)**

| sample | Added (D-Leu) | found    | rate of recovery (%) | RSD (%) |
|--------|---------------|----------|----------------------|---------|
| 1      | 5.0 mM        | 4.95 mM  | 99.0                 | 4.2     |
| 2      | 10.0 mM       | 10.25 mM | 102.5                | 3.1     |
| 3      | 0             | 1.0 mM   | -                    | —       |
